# 1 Shavenbaby and Yorkie mediate Hippo signaling 2 to protect adult stem cells from apoptosis

3 Jérôme Bohère<sup>1</sup>, Alexandra Mancheno-Ferris<sup>1</sup>, Kohsuke Akino<sup>2</sup>, Yuya Yamabe<sup>2</sup>,  
4 Sachi Inagaki<sup>3</sup>, Hélène Chanut-Delalande<sup>1</sup>, Serge Plaza<sup>4</sup>, Yuji Kageyama<sup>2,3</sup>, Dani  
5 Osman<sup>5</sup>, Cédric Polesello<sup>1\*</sup> & François Payre<sup>1\*</sup>

6 <sup>1</sup> Centre de Biologie du Développement (CBD), Centre de Biologie Intégrative (CBI), Université de Toulouse,  
7 CNRS, Bat 4R3, 118 route de Narbonne, F-31062 Toulouse, France

8 <sup>2</sup> Department of Biology, Graduate School of Science, Kobe 657-8501, Japan

9 <sup>3</sup> Biosignal Research Center, Kobe University, 1-1 Rokko-dai, Nada, Kobe 657-8501, Japan

10 <sup>4</sup> Present Address: Laboratoire de Recherche en Sciences Végétales (LSRV), CNRS, UPS, 24 chemin de Borde  
11 Rouge, Auzeville, 31326 Castanet-Tolosan, France

12 <sup>5</sup> Faculty of Sciences III and Azm Center for Research in Biotechnology and its Applications, LBA3B, EDST,  
13 Lebanese University, 1300, Tripoli, Lebanon

14 \* Correspondence and requests for materials should be addressed to C.P. or F.P.

15 (email: [cedric.polesello@univ-tlse3.fr](mailto:cedric.polesello@univ-tlse3.fr), [francois.payre@univ-tlse3.fr](mailto:francois.payre@univ-tlse3.fr) )

16

## 17 **Abstract**

18 To compensate for accumulating damages and cell death, adult homeostasis (e.g.,  
19 body fluids and secretion) requires organ regeneration, operated by long-lived stem  
20 cells. How stem cells can survive throughout the animal life yet remains poorly  
21 understood. Here we show that the transcription factor Shavenbaby (Svb, OvoL in  
22 vertebrates) is expressed in renal/nephric stem cells (RNSCs) of *Drosophila* and  
23 required for their maintenance during adulthood. As recently shown in embryos, Svb  
24 function in adult RNSCs further needs a post-translational processing mediated by  
25 Polished rice (Pri) smORF peptides and impairing Svb function leads to RNSC  
26 apoptosis. We show that Svb interacts both genetically and physically with Yorkie  
27 (YAP/TAZ in vertebrates), a nuclear effector of the Hippo pathway, to activate the  
28 expression of the inhibitor of apoptosis *DIAP1*. These data therefore identify Svb as a  
29 novel nuclear effector in the Hippo pathway, critical for the survival of adult somatic  
30 stem cells.

## 31 **Keywords**

32 Stem cells, OVOL/Shavenbaby, smORF peptides, Hippo pathway, apoptosis, Renal  
33 system, Malpighian tubules, *Drosophila*.

34 The family of OvoL/Ovo/Shavenbaby (Svb) transcription factors has been strongly conserved  
35 across evolution<sup>1</sup> and is characteristic of animal species. Initially discovered in flies for a dual  
36 function in the development of epidermal derivatives (Svb) and of the germline (Ovo)<sup>2, 3</sup>,  
37 mammalian orthologs (OvoL1-3) have soon been identified<sup>4-6</sup>. *OvoL/svb* genes produce  
38 several protein isoforms and the existence of three partially redundant paralogs in mammals  
39 complicates their genetic analysis. There is a single gene in *Drosophila*, which expresses  
40 germline- (*ovo*) and somatic-specific (*svb*) transcripts from different promoters. Previous  
41 work has well-established the role of Svb in the development of embryonic epidermal  
42 tissues<sup>3</sup>, where it triggers a tridimensional cell shape remodeling for the formation of actin-  
43 rich apical extensions, called trichomes. *Svb* expression is driven by a large array of *cis*-  
44 regulatory regions, which have become a fruitful paradigm for elucidating the function<sup>7, 8</sup> and  
45 evolution<sup>9-11</sup> of developmental enhancers. Svb enhancers directly integrate multiple inputs  
46 form upstream regulatory pathways<sup>7</sup> and often drive similar patterns, all together conferring  
47 robustness to epidermal development in the face of varying environmental conditions and/or  
48 genetic backgrounds<sup>7, 8</sup>. During embryogenesis, the Svb transcription factor directly activates  
49 a battery of >150 target genes<sup>12-14</sup> collectively responsible for actin and extra-cellular-matrix  
50 reorganization that underlie trichome formation<sup>15</sup>. Recent studies have unraveled a tight  
51 control of Svb transcriptional properties, in response to Polished rice (Pri, also known as  
52 Tarsal-less) peptides, which belongs to a novel family of peptides encoded from small open  
53 reading frames (smORF) hidden within apparently long noncoding RNAs<sup>16</sup>. Svb is first  
54 translated as a long-sized protein that acts as a repressor (Svb<sup>REP</sup>)<sup>17</sup>. Pri smORF peptides then  
55 induce a proteolytic processing of Svb<sup>REP</sup> leading to the degradation of its N-terminal region  
56 and releasing a shorter activator form, Svb<sup>ACT</sup><sup>17</sup>. Further work has demonstrated that *pri*  
57 expression is directly regulated by periodic pulses of steroid hormones<sup>18</sup>, allowing a  
58 functional connection between hard-wired genetic regulatory networks (*svb* expression) and

59 systemic hormonal control (mediated by *pri*) for a proper spatio-temporal control of  
60 epidermal cell morphogenesis<sup>16</sup>.

61         Recent studies suggest that OvoL/Svb factors display broader functions throughout  
62 epithelial tissues in both normal and various pathological situations. Molecular profiling of  
63 human tumors has revealed that OvoL deregulation is a feature of many carcinomas, directly  
64 linked to the metastatic potential of morbid cancers<sup>19-23</sup>, including kidney<sup>24</sup>. OvoL factors  
65 have been proposed<sup>25, 26</sup> to counteract a conserved core of regulators composed of Snail/Slug  
66 and Zeb1-2 transcription factors, as well as the micro RNA *mir200*, well known to promote  
67 epithelial-mesenchymal transition (EMT)<sup>27</sup>. The activity of OvoL might help stabilizing a  
68 hybrid E/M phenotype<sup>21, 25</sup>, providing many advantages for both tumors and normal stem  
69 cells<sup>28</sup>. Indeed, recent data show that, like adult somatic stem cells, the most aggressive  
70 tumors often display a hybrid phenotype between mesenchymal and epithelial states<sup>27</sup>, and the  
71 expression of specific OvoL isoforms can annihilate the metastatic potential of mammary  
72 tumors<sup>29, 19</sup>. In addition, OvoL/Svb factors have been linked to the control of various  
73 progenitors/stem cells, from basal invertebrates<sup>30</sup> to mammals<sup>31-33</sup>. Therefore, whereas a large  
74 body of evidence supports a key role for OvoL/Svb in the behavior of somatic stem cells, a  
75 functional investigation of their mode of action *in vivo* remains to be undertaken.

76 Here we built on the knowledge and tools accumulated for the study of Svb function in flies  
77 to investigate its putative contribution to the behavior of somatic stem cells in the adult. We  
78 show that in the Malpighian tubules, which ensure essential renal functions in insects<sup>34, 35</sup>, *svb*  
79 is specifically expressed in the adult renal and nephric stem cells (RNSCs, see Fig. 1a). We  
80 further find that a main function of Svb in the kidney is to protect RNSCs from apoptosis by  
81 controlling the expression of the inhibitor of apoptosis, *DIAP1*, in interaction with Yorkie, a  
82 nuclear effector of the Hippo pathway.

## 83 Results and Discussion

### 84 *svb* is expressed in Renal Nephric Stem Cells and controls their maintenance

85 To assay whether *svb* might be expressed in the adult, we tested large genomic reporter  
86 constructs that cover each of the seven enhancers contributing to *svb* expression. We found  
87 that one enhancer<sup>9</sup>, *svb*<sup>E10</sup>, drove specific expression in tiny cells of the Malpighian tubules  
88 (Supplementary Fig. 1a, b).

89 Adult Malpighian tubules are mainly composed of two types of differentiated cells<sup>35</sup>  
90 (Fig. 1a). The principal cells -characterized by the homeodomain Cut protein- express the  
91 vacuolar-ATPase (V-ATPase) that establishes an H<sup>+</sup> electrochemical potential promoting  
92 *trans*-epithelial secretion of Na<sup>+</sup> and K<sup>+</sup> <sup>34</sup>. The second main population of Malpighian  
93 tubules are termed stellate cells, featured by the expression of the Teashirt transcription  
94 factor, and that regulate the transport of Cl<sup>-</sup> and water<sup>34</sup>. While both principal and stellate  
95 cells display large-sized polyploid nuclei, a third population of tiny diploid cells<sup>36</sup> are located  
96 in the lower tubules and correspond to RNSCs<sup>34, 35, 37</sup> (Fig. 1a). RNSCs derive from a  
97 subpopulation of intestinal stem cell precursors that colonize Malpighian tubules during post-  
98 embryonic development<sup>37, 38</sup>. RNSCs are characterized by the expression of Escargot, a  
99 transcription factor of the Snail/SLUG family that is also expressed in intestinal stem cells  
100 (ISCs<sup>39</sup>) where it acts to prevent ISC differentiation<sup>40, 41</sup>. Co-localization with an *esg*-LacZ  
101 reporter confirmed that the *svb*<sup>E10</sup> enhancer was active in RNSCs (Fig. 1b and Supplementary  
102 Fig. 1b). To define the minimal region of *svb* responsible for the expression in RNSCs, we  
103 assayed a collection of overlapping constructs<sup>7</sup>. This identified two independent elements, the  
104 *svb*<sup>E3N</sup> and *svb*<sup>E6</sup> enhancers<sup>7, 9</sup>, which despite having distinct activities during embryogenesis<sup>9</sup>,  
105 <sup>42</sup> drove similar expression in adult RNSCs (Supplementary Fig. 1c).

106           Having established that two enhancers drive specific expression of *svb* in the adult  
107 stem cells of the renal system, we next assayed consequences of depleting *svb* function in  
108 RNSCs. We used a well-controlled genetic system, hereafter referred to as *esg<sup>ts</sup>*, ensuring  
109 RNAi-mediated gene depletion, specifically in the stem cells and only at the adult stage<sup>43</sup>. We  
110 also developed an image analysis pipeline, allowing automated quantification of the whole  
111 population of RNSCs (see methods). In control conditions, the number of *esg*-positive RNSCs  
112 remains stable after adult hatching, with approx. 350 cells *per* tubules (Fig. 1c,d). We only  
113 noticed a weak reduction of RNSCs (300 cells) after one month. In contrast, *esg<sup>ts</sup>*-driven  
114 RNAi depletion of *svb* led to a dramatic loss of RNSCs, which were completely absent after  
115 32 days of treatment (Fig. 1c,d). The effects of *svb* depletion were already strong following 8  
116 days of treatment, with a two-fold reduction in the number of RNSCs. Similar results were  
117 observed when using an independent driver of RNSCs (*Dome-meso-gal4*) to direct RNAi-  
118 mediated knockdown of *svb* (Supplementary Fig. 1d,e). The loss of RNSCs upon *svb*  
119 depletion was also confirmed by staining against Hindsight, another transcription factor  
120 specific of RNSCs within Malpighian tubules (Supplementary Fig. 1d,e). Finally, the key role  
121 of *svb* in the maintenance of adult RNSCs was further demonstrated by results from genetic  
122 mosaics, showing that *svb*-null mutant cells<sup>44</sup> were unable to maintain RNSCs (Fig. 1e).

123 Taken together, these data thus reveal that *svb* is specifically expressed in RNSCs and  
124 critically required for the maintenance of the adult stem cell compartment.

125

## 126 **Svb processing is essential for its activity in Renal Nephric Stem Cells**

127 In the epidermis, Svb activity relies on a proteolytic processing that causes a switch from a  
128 repressor to an activator form. This processing is gated by Pri regulatory peptides, which bind  
129 to and activate the Ubr3 ubiquitin E3-ligase that, in turn, triggers a limited degradation

130 operated by the proteasome<sup>45</sup> (Fig. 2a). Thereby, *pri* mediates a systemic control of Svb  
131 maturation since the expression of *pri* is directly regulated by the ecdysone receptor (EcR)<sup>18</sup>.  
132 To assess whether the function of Svb in Malpighian tubules also required its proteolytic  
133 maturation, we investigated a putative function of *pri* and *ubr3* in RNSCs. We screened a  
134 collection of *pri* reporter lines<sup>18, 46</sup> and identified two *cis*-regulatory regions driving  
135 expression in RNSCs (Fig. 2b and Supplementary Fig. 2a,b). Consistently with the expression  
136 of *pri* in RNSCs, *pri* depletion almost fully eliminated RNSCs upon 8 days of RNAi  
137 treatment (Fig. 2d and Supplementary Fig. 2c). In addition, a dominant negative form of the  
138 Ecdysone Receptor (EcRDN) that abolishes *pri* expression during both embryonic and post-  
139 embryonic development<sup>18</sup> was sufficient to reduce the number of stem cells when specifically  
140 expressed in adult RNSCs (Fig. 2d). Furthermore, we found that *ubr3* was also required for  
141 RNSC maintenance, as deduced from results of RNAi-mediated depletion and genetic  
142 nullification<sup>45</sup> of *ubr3* activity (Fig. 2c,d). Finally, the expression of OvoA that behaves as a  
143 constitutive repressor isoform of Svb<sup>17, 44, 47</sup> mimicked the effects observed in *svb* loss of  
144 function conditions (Fig. 2d). Reciprocally, the expression of OvoB that acts as a constitutive  
145 activator isoform of Svb<sup>17, 44, 47</sup> was sufficient to rescue the lack of *ubr3* function (Fig. 2d and  
146 Supplementary Fig. 2c), demonstrating that Svb function in RNSCs relies on its matured  
147 transcription activator form.

148 These results provide compelling evidence that the whole regulatory machinery discovered  
149 for its role in the development of epidermal cells<sup>17, 18, 45</sup> is also at work in adult RNSCs. We  
150 therefore concluded that the post-translational maturation of the Svb transcription factor is  
151 essential for the maintenance of RNSCs.

152

## 153 **Svb protects Renal Nephric Stem Cells from apoptosis**

154 The loss of RNSCs observed following the lack of *svb* function or maturation could  
155 theoretically result from at least three different causes: i) lack of proliferation, ii) precocious  
156 differentiation, or iii) increased cell death. Consistent with the quiescent behavior of RNSCs,  
157 we observed a very low frequency of RNSC mitosis in controls, as deduced from staining  
158 with the mitotic marker Histone3-P (Supplementary Fig. 3a) and as previously noticed<sup>37</sup>.  
159 Therefore, even a complete block of stem cell division cannot account for the disappearance  
160 of RNSCs observed in the absence of *svb*. Using the lineage-tracing system called ReDDM  
161 that has been recently developed for intestinal stem cells<sup>48</sup>, we next investigated a putative  
162 influence of *svb* on RNSC differentiation. Based on differences in the stability of two  
163 fluorescent proteins, ReDDM allows marking renal progenitors that express both mCD8::GFP  
164 and H2B::RFP, while their progeny only maintain the very stable H2B::RFP<sup>48</sup>. In control  
165 conditions, we detected very rare H2B::RFP progeny (Fig. 3a) confirming low cell renewal in  
166 Malpighian tubules<sup>37</sup>. Recent work has shown that the expression of *mir-8* (the *Drosophila*  
167 homolog of *mir-200* in vertebrates) downregulate the expression of EMT-inducing factors  
168 Escargot and Zfh1 (the homolog of Zeb1), triggering a strong burst of stem cell differentiation  
169 in the intestine<sup>48</sup>. Similarly, we found that *mir-8* expression in RNSCs forced *esg*+ cells to  
170 differentiate and only rare RNSCs persisted after 8 days of treatment (Fig. 3a). Upon *mir-8*  
171 expression, the progeny (H2B::RFP-positive, GFP-negative cells) of RNSCs present in lower  
172 tubules also expressed Alkaline Phosphatase 4, a marker of a subset of differentiated principal  
173 cells<sup>49</sup> confirming that the depletion of RNSCs upon *mir-8* overexpression was caused by  
174 their premature differentiation (Supplementary Fig. 3b). In contrast, no modification of the  
175 progenitors/progeny ratio was observed in *svb*-RNAi conditions when compared to controls,  
176 showing that *svb* depletion does not trigger RNSC differentiation (Fig. 3a). Finally, we tested  
177 whether *svb*-depleted RNSCs were lost because they underwent apoptosis. Since apoptotic



178 figures are difficult to observe in the digestive track<sup>50</sup> including the Malpighian tubules, we  
179 assayed consequences of blocking programmed cell death by expressing the viral caspase  
180 inhibitor p35<sup>51</sup>. Although the expression of p35 had no detectable effect by itself on RNSCs,  
181 it significantly rescued the number of RNSCs when *svb* was depleted (Fig. 3c and see below).  
182 Taken together, these data show that the loss of RNSCs observed upon *svb* loss of function is  
183 primarily due to stem cell death, indicating that a main role of Svb is to protect adult stem  
184 cells from undergoing apoptosis.

185

### 186 **Svb acts downstream of Hippo**

187 During epidermal development, *svb* is expressed in post-mitotic cells where it acts as a  
188 terminal differentiation factor that controls cell shape remodeling<sup>15, 52</sup>. We noticed that  
189 RNSCs lacking *svb* displayed a reduced size, as well as an altered morphology (Fig. 3b). One  
190 could speculate that these defects in cell shape might stress RNSCs and thus induce apoptosis.  
191 Indeed, the Hippo pathway<sup>53, 54</sup> is a key sensor of mechanical stress renowned to induce  
192 apoptosis following cytoskeleton modifications<sup>55, 56</sup>. The core Hippo complex is composed of  
193 two kinases, Hippo (Hpo) and Warts and two scaffolding proteins, Salvador and Mob As  
194 Tumor Suppressor<sup>53, 54</sup>. Activation of Hippo leads to the phosphorylation of the co-  
195 transcription factor Yorkie (Yki) that results in Yki nuclear exclusion/degradation, preventing  
196 its positive action on the transcription of target genes such as *DIAP1* and *bantam*<sup>53, 54</sup>.  
197 Previous work has shown that the Hippo pathway is a key regulator of the *Drosophila* gut  
198 homeostasis, controlling survival and proliferation of stem cells for tissue regeneration<sup>57, 58</sup>.  
199 Consistently, we found that the activation of Hpo induced a strong reduction in the number of  
200 RNSCs. However, co-expression of OvoB, the constitutive activator isoform of Svb, together  
201 with Hpo was sufficient to rescue the loss of RNSCs (Fig. 4a). These results therefore

202 demonstrated that if *Svb* and *Hpo* interact for the homeostasis of RNSCs, the loss of RNSCs  
203 observed upon *svb* knockdown is not due to the activation of the Hippo pathway, since *Svb* is  
204 instead acting downstream *Hpo*. In contrast, overexpression of *Yki* (mimicking a loss of  
205 Hippo signaling<sup>59</sup>) induced a strong increase in *esg*<sup>+</sup> renal cells, which displayed abnormal  
206 tumor-like morphology when compared to wild-type RNSCs (Fig. 4a). Unexpectedly, this  
207 increase in the number of renal stem cells was entirely suppressed upon *svb* depletion, or  
208 expression of the constitutive repressor *OvoA* (Fig. 4a and Supplementary Fig. 3f).  
209 Quantification indicated that *esg*<sup>+</sup> cells overexpressing *Yki* were even more sensitive to *svb*  
210 loss-of-function than otherwise normal RNSCs (Fig. 4a), a result well in line with the extra-  
211 resistance of intestinal stem cells to apoptosis when compared to tumorous stem-like cells<sup>50</sup>.  
212 Hence, the function of *Yki* in RNSCs requires *Svb*, suggesting that *Svb* was acting either  
213 downstream or in parallel with this nuclear effector of Hippo. Several lines of evidence ruled  
214 out the former and validated the latter hypothesis. First, knocking down *Yki* also led to RNSC  
215 loss (Supplementary Fig. 3c). Expression of the *Svb* constitutive activator (*OvoB*) was  
216 nevertheless not able to rescue RNSC survival in the absence of *Yki* (as opposed to the over  
217 expression of *Hpo*, Fig. 4a), showing that *Svb* requires *Yki* activity for RNSC maintenance  
218 (Fig. 4a and Supplementary Fig. 3c). Second, although *Yki* is sufficient to induce *DIAP1*  
219 expression<sup>60</sup> (and see below), *Yki* was not able to rescue the lack of *Svb* while *DIAP1* alone  
220 did (Fig. 4a). Indeed, we found that *DIAP1* was sufficient to compensate for *svb*-depletion  
221 (Fig. 4a and Supplementary Fig. 3f). In sum, while both *Svb* and *Yki* are required for RNSC  
222 maintenance, re-expression of *Yki* is not sufficient to rescue the loss of *svb* function.  
223 Reciprocally, *Svb* is not sufficient to rescue a proper RNSC compartment in the absence of  
224 *Yki*, showing that *Svb* and *Yki* act in parallel for the survival of adult stem cells.  
225 We thus concluded that *Svb* acts downstream of Hippo cytoplasmic core components and,  
226 together with *Yki*, both nuclear factors are required to protect RNSCs from apoptosis.

## 227 **Svb as a novel nuclear effector of the Hippo pathway**

228 Having established that Svb and Yki genetically interact, we wondered whether the two  
229 proteins might interact to control the expression of common target genes, *e.g.*, *DIAP1*. Yki is  
230 unable to bind DNA by itself and need to associate to sequence-specific-transcription  
231 factors<sup>54</sup>. Interestingly, Yki contains two WW protein domains shown to mediate interaction  
232 with partners bearing PPxY motifs (such as Wts<sup>60</sup>, Wbp2<sup>61</sup> and Mad<sup>59</sup>), and we detected two  
233 PPxY motifs within the Svb protein, at position 523 (PPFY) and 881 (PPSY). Co-  
234 immunoprecipitation assays showed that Svb bound to the wild type form of Yki, while the  
235 mutation of Yki WW motifs was sufficient to abrogate the interaction with Svb (Fig. 4c). A  
236 second piece of evidence emerged from the comparison of chromatin immuno-precipitation  
237 (ChIP-seq) datasets between Svb<sup>14</sup> and Yki<sup>62</sup>. We found that Svb and Yki share 836 common  
238 genomic binding sites (Supplementary Fig. 4a) and statistical tests established the  
239 significance of this overlap (Supplementary Fig. 4b). Interestingly, co-binding of Yki was rare  
240 for the direct target genes of Svb identified in the epidermis<sup>12-14</sup>, as illustrated by *shavenoid* or  
241 *dusky-like* that both lack Yki binding (Supplementary Fig. 4d,d'). In contrast, Svb was often  
242 bound to known Yki target genes, such as *bantam*, *fat*, *piwi* or *nanos*<sup>63</sup> (Supplementary Fig.  
243 4c,c'). ChIP-seq also revealed that Svb and Yki bound to a same region of *DIAP1*, within an  
244 enhancer driving specific expression in adult intestinal stem cells<sup>64</sup> (Fig. 4b). We therefore  
245 tested if Svb might regulate *DIAP1* expression. Although very weak in control conditions,  
246 expression of *DIAP1-LacZ* was strongly enhanced upon Yki overexpression. This induction  
247 was completely antagonized by OvoA (Fig. 4d). Similar results were obtained with the  
248 isolated *DIAP1* enhancer (*DIAP1-4.3-GFP*) containing the binding sites of Yki and Svb, the  
249 expression of which was again enhanced by Yki overexpression and abrogated upon  
250 counteracting Svb activity (Fig. 4e). These data thus strengthen the conclusion that Svb and

251 Yki functionally interact in RNSCs to prevent apoptosis, at least in part through promoting  
252 *DIAP1* expression.

253 One important question was whether the interaction between Svb and the Hippo pathway also  
254 took place in other tissues. The function of Hippo has been initially described in imaginal  
255 discs, which give rise to most adult tissues<sup>65</sup> and Yki overexpression promotes cell  
256 proliferation in both wing and eye discs<sup>60</sup>. We tested Svb/Yki genetic interactions in the wing  
257 using *collier-Gal4* that drives expression in the medial (L3-L4) intervein region. *Yki* over-  
258 expression resulted in the expansion of this region due to tissue overgrowth (Supplementary  
259 Fig. 3d). In contrast, *OvoA* leads to both a reduction of the L3-L4 region and the absence of  
260 epidermal trichomes. As in RNSCs, *OvoA* was epistatic to Yki, since the wing region  
261 expressing both *yki* and *ovoA* was smaller than in controls and lacked trichomes  
262 (Supplementary Fig. 3d). In the eye, overexpression of Yki using the *GMR-Gal4* driver  
263 promoted extra cell proliferation resulting in an increased eye size. Similar results were  
264 obtained following *pri* overexpression, and co-expressing *pri* and *yki* resulted in a synergistic  
265 eye growth (Supplementary Fig. 3e). Northern blotting of RNAs extracted from adult heads  
266 revealed that *DIAP1* mRNA levels were increased following *pri* overexpression  
267 (Supplementary Fig. 4e), while there was no effect on *yki* or *cycE* mRNA.

268 We interpret these results to imply that Svb functionally interacts with Yorkie, both in adult  
269 stem cells and in developing tissues, to regulate a subset of transcriptional targets of the  
270 Hippo pathway, including the activation of *DIAP1* expression.

## 271 **Conclusions**

272 Our results show that Shavenbaby is expressed and required for the maintenance of adult  
273 renal stem cells (RNSCs) in flies, supporting the conclusion that the OvoL/Svb family of  
274 transcription factors plays a key and evolutionarily-conserved role in the behavior of  
275 progenitors-stem cells.

276 The role of Svb in adult stem cell maintenance in flies requires both a fine control of its  
277 expression and of its transcriptional activity. Svb expression in RNSCs involves at least two  
278 separable enhancers, driving similar expression patterns. Svb was one the first cases to reveal  
279 the functional importance of apparently redundant (or shadow) enhancers in the phenotypic  
280 robustness of developmental networks<sup>8</sup>. Our data suggest that a similar *cis*-regulatory  
281 architecture is also underlying the control of adult stem cells.

282 RNSCs maintenance further requires a proper post-translational maturation of the Svb  
283 protein, in the response to Pri smORF peptides. During both embryonic<sup>17</sup> and post-embryonic  
284 development<sup>18, 45</sup>, the main role of Pri peptides is to provide a temporal control of Svb  
285 activity, conveying systemic steroid signaling<sup>18</sup>. It is therefore possible that Pri smORF  
286 peptides also connect genetic networks to hormonal control for the regulation of adult stem  
287 cells. Recent work has shown that various smORF peptides contribute to the regulation of  
288 developmental pathways, muscle formation and physiology, etc...<sup>16, 66, 67</sup>, and our findings  
289 extend their influence to the control of adult stem cells. It has been proposed that the  
290 emerging field of smORF peptides may open novel therapeutic strategies, for example  
291 peptidomimetic drugs, which might also be of interest for regenerative medicine.

292 Complementary data establish that a main function of Svb in adult stem cells is mediated by a  
293 functional interplay with the Hippo pathway, well established for its roles in the control of  
294 adult stem cells<sup>53, 57, 58, 68</sup>. Our results indicate that Svb behaves as a novel nuclear effector of

295 Hippo, relying on a direct interaction with Yorkie in order to protect stem cells from  
296 apoptosis, at least in part through the regulation of *DIAP1* expression. Analysis of genome-  
297 wide binding events further suggests that the Svb/Yki interaction is involved in the control of  
298 a broader set of Hippo-regulated genes, including during development. Since both Pri and  
299 Ubr3 are also essential for the survival of adult stem cells, it is interesting to note that Ubr3  
300 protects the DIAP1 protein from degradation<sup>69</sup>, and direct binding of Ubr3 on the activated  
301 form of DIAP1 is elicited in the presence of Pri peptides<sup>45</sup>. Therefore, in addition to the  
302 control of *DIAP1* expression (*via* Svb), Ubr3 and Pri could also stabilize the DIAP1 protein to  
303 protect stem cells from apoptosis. Although initially restricted to TEAD transcription factors,  
304 the number of Yorkie (YAP/TAZ) nuclear partner is rapidly growing<sup>54</sup>. Recent work has  
305 shown a direct interaction of YAP/TAZ with the Snail/Slug pro-EMT factors in the control of  
306 stem cell renewal and differentiation<sup>70</sup>. As previously reported for intestinal stem cells<sup>40, 41, 48</sup>,  
307 pro-EMT regulators are also required for preventing premature differentiation of renal stem  
308 cells. While pro-EMT and OvoL factors are often viewed as antagonistic factors<sup>19, 21, 25</sup>, *in*  
309 *vivo* studies in *Drosophila* stem cells show that they both contribute to their maintenance,  
310 Svb/Yki preventing their apoptosis and EMT factors their differentiation. Many studies  
311 having implicated the Hippo pathway, pro-EMT and OvoL/Svb factors in various tumors,  
312 new insights into their functional interactions in adult stem cells may provide additional  
313 knowledge directly relevant to understand their connections in human cancers.

## 314 **Methods**

315 **Fly stocks.** The following *Drosophila* stocks were used in this study: *tsh-LacZ* (BL#11370),  
316 *esg-lacZ* (BL#10359), *esg-Gal4*, *UAS-GFP*; *tubulin-Gal80<sup>ts</sup>/SM6-TM6B*<sup>43</sup> (B. Edgar), *yw*,  
317 *hsFLP*, *tubulin-Gal80 FRT19A*; *UAS-mcd8::GFP/Cyo*; *tubulin-Gal4/TM6 Tb* (N. Tapon), *esg-*  
318 *Gal4,UAS-mcd8::GFP/Cyo*; *UAS-H2B::RFP*, *tubulin-Gal80<sup>ts</sup>/TM2*<sup>48</sup> (M. Dominguez), *col-*  
319 *Gal4*, *UAS-mcd8::GFP/Cyo* and *domeMeso-Gal4* (M. Crozatier), *GMR-Gal4 /Cyo*  
320 (BL#9146), *tal-Gal4/ TM3 Sb* (J.P. Couso), *svb<sup>E</sup>-GFP*, *svb<sup>E10</sup>-lacZ*, *svb<sup>E3N</sup>-lacZ*, *svb<sup>E6</sup>-lacZ*  
321 (D. Stern), *svb<sup>E3N</sup>-GFP* (this work), *svb<sup>R9</sup>*, *FRT19A/ FMO*<sup>44</sup>, *ubr3<sup>B</sup> FRT19A/ FMO*<sup>45</sup> (H.  
322 Bellen), *Diap1-lacZ* (BL#12093) , *UAS-svb RNAi* (VDRC #v40316), *UAS-ubr3 RNAi* (VRDC  
323 #22901), *UAS-yki RNAi* (VDRC #KK104523), *UAS-pri RNAi* (J.P. Couso), *UAS-OvoA*<sup>44</sup>,  
324 *UAS-OvoB*<sup>44</sup>, *UAS-EcRDN* (BL#9449), *UAS-mir8* (S.M. Cohen), *UAS-p35* (B. Monier),  
325 *UAS-hpo/CyO* (N. Tapon), *UAS-yki/TM3 Sb* (D.J. Pan), *UAS-DIAP1* (N. Tapon), *UAS-*  
326 *pri/CyO* (J.P. Couso).

327 Flies were cultured (unless otherwise noted) at 25°C, using standard cornmeal food (*per* liter:  
328 17g inactivated yeast powder, 80g corn flour, 9g agar, 45g white sugar and 17ml of Moldex).  
329 Similar results were also observed using a richer medium (same composition except 45g of  
330 yeast powder). Female adult flies were used in all analyses throughout the study and placed  
331 on fly food supplemented with fresh yeast, which was changed every two days. Conditional  
332 expression in RNSCs was achieved by maintaining *tub-Gal80<sup>ts</sup>* expressing flies at 18°C, until  
333 adulthood. Eclosed females aged for 3- to 4-days were shifted to 29°C for induction of gene  
334 expression and were kept at 29°C for the indicated period of time (in most cases 8 days).  
335 Virgin females bearing *svb<sup>R9</sup>*, *svb<sup>PL107</sup>* or *ubr3<sup>B</sup>* mutations<sup>44, 45</sup> over FM0 balancers were mated  
336 with males of the following genotype: *yw*, *hs-FLP*, *tub-Gal80*, *FRT19A*; *UAS::mcd8-GFP*;  
337 *tub-Gal4/TM6,Tb*. Females of the correct phenotype (no *B* and no *Tb*) were heat shocked for  
338 1h at 37°C. Flies were transferred on fresh food every two days and dissected at the indicated



339 time. Detailed information about the full genotype of each *Drosophila* stock is given in the  
340 genotype section below.

341 **Histology.** Tissues were dissected in 1X PBS, fixed in 4% formaldehyde in PBS for 15 min  
342 at room temperature, washed for 5 min in PBS containing 0.1% Triton X-100 (PBT) and fixed  
343 again during 20 min. Following a 5 min wash (PBT 0.1), tissues were then blocked for 30  
344 minutes in PBT containing 1% BSA. Primary antibodies were incubated overnight at 4°C.  
345 Anti-β-Galactosidase (Cappel) antibody was used at 1/1000, Cut (DSHB) and GFP antibodies  
346 at 1/200, and phospho-HistoneH3 (Upstate) and Disc-large (DSHB) antibodies at 1/500.  
347 AlexaFluor-488 or 555 secondary antibodies (Molecular Probes) were incubated for 2 hrs at  
348 room temperature at 1/500. After washes, tissues were mounted in Vectashield (Vector). For  
349 X-gal staining, adult tissues were dissected in 1X PBS, fixed in 1% glutaraldehyde in PBS for  
350 15 min at room temperature and washed in PBS. The staining solution was warmed up at  
351 37°C for 10 min plus 10 other min after addition of 8% X-Gal (5-bromo-4-chloro-3-indoyl-β-  
352 D-Galactopyranoside). The X-Gal solution used to reveal the β-Galactosidase activity was:  
353 10mM NaH<sub>2</sub>PO<sub>4</sub>.H<sub>2</sub>O/ NA<sub>2</sub>HPO<sub>4</sub>.2H<sub>2</sub>O (pH=7.2), 150mM NaCl, 1mM MgCl<sub>2</sub>.6H<sub>2</sub>O,  
354 3.1mM K<sub>4</sub> (FeII(CN)<sub>6</sub>), 3.1mM K<sub>3</sub> (FeIII(CN)<sub>6</sub>), 0.3 % Triton X-100. Bright-field pictures  
355 were acquired using a Nikon eclipse 90i microscope.

356 **Microscopy, image and statistical analysis.** Images of whole Malpighian tubules were  
357 acquired on a LSM710 confocal scanning microscope (X20 objective), using automated  
358 multi-position scan. After stitching, tiled images of individual pairs of tubules were analyzed  
359 with IMARIS 8.0 to quantify the number of GFP-positive cells. Data of at least three  
360 independent experiments (approx. 20 tubules) were analyzed with GraphPad Prims 5, using  
361 two-tailed Mann-Whitney tests. The statistical significance of differences observed between  
362 compared genotypes was indicated as: \*\*\* (p<0.001), ns (p>0.05). Close-up pictures were



363 acquired using Leica SPE and Leica SP8 confocal laser scanning microscopes (X40 and X63  
364 objectives). Laser intensity and background filtering was set according to the control samples  
365 and remained the same for all subsequent samples. The intensity of most pictures has been  
366 enhanced equally for all images within the same experiment using adjustments in Photoshop  
367 CS5. All images were processed using Adobe Photoshop, Illustrator CS5 and Inkscape 0.91.

368 **Western blotting and immunoprecipitation.** *Drosophila* S2 cells were grown in  
369 Schneider medium supplemented with 10% fetal calf serum and 1% penicillin/streptomycin  
370 (Invitrogen) at 25°C. We used stable cell lines co-expressing the copper-inducible constructs  
371 pMT-Svb::GFP and pMT-pri<sup>17</sup>. S2 cell lines were cultured in six-well plates (1.75x10<sup>6</sup>  
372 cells/3ml) and transfected in 100 µl of Opti-MEM (Invitrogen) with 3 µl of FugeneHD  
373 (Promega) and the indicated constructs. CuSO<sub>4</sub> (final concentration of 1mM) was used to  
374 induce the expression of pMT plasmids. The following plasmids were used: pAc-Yki::HA  
375 and its related mutated version pAc-Yki-WW::HA. Cells were lysed in 250 µl of ice-cold  
376 lysis buffer (150 mM NaCl, 50mM Tris [pH 8], 0.5% NP40, 1mM EGTA, 0.5M NaF,  
377 200mM vanadate, phosphatase inhibitor cocktail 1 (Sigma) and protease inhibitors (Roche).  
378 After clearing by centrifugation at 14,000 rpm for 10 min, immuno-precipitations were done  
379 from transfected lysates in lysis buffer using anti-GFP antibody (GFP-trap, Chromotek).  
380 Immuno-precipitated samples were separated by SDS-PAGE and transferred to PVDF  
381 membranes, then blotted using anti-GFP (TP401, Acris Antibodies, 1:10000) and anti-HA  
382 (Covance, 1:2.000) antibodies. Secondary antibodies anti-mouse or anti-rabbit IgG-HRP  
383 conjugates (Jackson Laboratory, 1:10.000) were detected using ECL Clarity (Biorad).

384 **Northern blot analysis.** Using adult total RNAs as a starting material, DNA fragments  
385 containing coding sequence of *yki*, *CycE* and *DIAP1* were reverse transcribed and PCR-  
386 amplified with pairs of specific primers: CTGCC CAACT CCTTC TTCAC (forward) and

387 AACTG AATGG GGCTG ATGAC (reverse) for *yki*; GATGA CGTTG AGGAG GAGGA  
388 (forward) and TGCGT CTTCT GCACC TTATG (reverse) for *CycE*; CCGAG GAACC  
389 TGAAA CAGAA (forward) and GCACA ACTTT TCCTC GGGTA (reverse) for *DIAP1*. A  
390 SP6 promoter sequence (CAAGC TATTT AGGTG ACACT ATAG) was attached to each  
391 reverse primer for *in vitro* transcription. DIG-labelled probes were prepared with SP6 RNA  
392 polymerase, according to the supplier's manual (Roche). Northern blot analysis was described  
393 previously<sup>18</sup>. Briefly, 2 days-old adults were frozen with liquid nitrogen and heads were  
394 sorted with sieves, followed by RNA purification with Isogen (Nippon Gene). 1 µg of RNA  
395 *per* lane was separated by formaldehyde–agarose gel electrophoresis and then transferred to a  
396 nylon membrane (Roche). Hybridization and wash procedures were carried out at 52°C and  
397 65°C, respectively. The filters were reacted with an alkaline phosphatase-conjugated anti-DIG  
398 antibody (Roche) and chemiluminescent reactions with CPD-Star (Roche) were detected by  
399 LAS 4000mini (GE Healthcare).

## 400 Genotypes

401 **Figure 1A:** *yw/w; esg-Gal4, UAS-GFP/ tsh-LacZ*

402 **Figure 1B:** *yw/w; esg-LacZ/+; svb<sup>E3N</sup>-GFP/+*

403 **Figure 1C&D control:** *yw/w; esg-Gal4, UAS-GFP/+; tubulinGal80<sup>ts</sup>/+*

404 **Figure 1C&D svb-RNAi:** *yw/w; esg-Gal4, UAS-GFP/+; tubulin-Gal80<sup>ts</sup>/ UAS-svb-RNAi*

405 **Figure 1E control:** *yw, hsFLP, tubulin-Gal80 FR19A; UAS-mCD8::*GFP*/+; tubulin-Gal4/  
406 *ry<sup>506</sup>**

407 **Figure 1E svb<sup>R9</sup>:** *yw, hsFLP, tubulin-Gal80 FR19A/ yw svb<sup>R9</sup> FRT19A; UAS-mCD8::*GFP*/+;*  
408 *tubulin-Gal4/+*

409 **Figure 2B:** *tal-Gal4/ UAS-HB2::*RFP**

410 **Figure 2C control:** *yw, hsFLP, tubulin-Gal80 FR19A; UAS-mCD8::*GFP*/+; tubulin-Gal4/  
411 *ry<sup>506</sup>**

412 **Figure 2C ubr3<sup>B</sup>:** *yw, hsFLP, tubulin-Gal80 FR19A/ yw ubr3<sup>B</sup> FRT19A; UAS-mCD8::*GFP*/+;*  
413 *tubulin-Gal4/+*

414 **Figure 2D control:** *yw/w; esg-Gal4, UAS-GFP/+; tubulin-Gal80<sup>ts</sup>/+*

415 **Figure 2D svb-RNAi:** *yw/w; esg-Gal4, UAS-GFP/+; tubulin-Gal80<sup>ts</sup>/ UAS-svb-RNAi*

416 **Figure 2D ovoA:** *yw/w; esg-Gal4, UAS-GFP/+; tubulin-Gal80<sup>ts</sup>/ UAS-ovoA*

417 **Figure 2D ovoB:** *yw/w; esg-Gal4, UAS-GFP/+; tubulin-Gal80<sup>ts</sup>/ UAS-ovoB*

418 **Figure 2D pri-RNAi:** *yw/w; esg-Gal4, UAS-GFP/+; tubulin-Gal80<sup>ts</sup>/ UAS-pri-RNAi*

419 **Figure 2D EcRDN:** *yw/w; esg-Gal4, UAS-GFP/+; tubulin-Gal80<sup>ts</sup>/ UAS-EcRDN<sup>B2w650A</sup>*

420 **Figure 2D ubr3-RNAi:** *yw/w; esg-Gal4, UAS-GFP/ UAS-ubr3 RNAi; tubulin-Gal80<sup>ts</sup>/+*

421 **Figure 2D ubr3-RNAi + ovoB:** *yw/w; esg-Gal4, UAS-GFP/ ubr3 RNAi; tubulin-Gal80<sup>ts</sup>/ UAS-  
422 ovoB/+*

423 **Figure 3A control:** *yw/w; esg-Gal4, UAS-mCD8::*GFP*/+; UAS-H2B::*RFP, tubulin-Gal80<sup>ts</sup>/+**

424 **Figure 3A mir8:** *yw/w, UAS-mir8; esg-Gal4, UAS-mCD8::*GFP*/+; UAS-H2B::*RFP, tubulin-  
425 Gal80<sup>ts</sup>/+**

426 **Figure 3A svb-RNAi:** *yw/w ; esg-Gal4, UAS-mCD8::*GFP*/+; UAS-H2B::*RFP, tubulin-  
427 Gal80<sup>ts</sup>/ UAS-svb RNAi**

428 **Figure 3B control:** *yw/w; esg-Gal4, UAS-GFP/+; tubulin-Gal80<sup>ts</sup>/+*

429 **Figure 3B svb-RNAi:** *yw/w; esg-Gal4, UAS-GFP/+; tubulin-Gal80<sup>ts</sup>/ UAS-svb-RNAi*

430 **Figure 3C control:** *yw/; esg-Gal4, UAS-GFP/+; tubulin-Gal80<sup>ts</sup>/+*

431 **Figure 3C p35:** *yw/; esg-Gal4, UAS-GFP/ UAS-p35; tubulin-Gal80<sup>ts</sup>/+*

432 **Figure 3C svb-RNAi:** *yw/; esg-Gal4, UAS-GFP/+; tubulin-Gal80<sup>ts</sup>/ UAS-svb-RNAi*

433 **Figure 3C p35+ svb-RNAi:** *yw/; esg-Gal4, UAS-GFP/ UAS-p35; tubulin-Gal80<sup>ts</sup>/ UAS-svb-  
434 RNAi*

435 **Figure 4A control:** *yw/; esg-Gal4, UAS-GFP/+; tubulin-Gal80<sup>ts</sup>/+*

436 **Figure 4A hpo:** *yw/; esg-Gal4, UAS-GFP/ UAS-hpo; tubulin-Gal80<sup>ts</sup>/+*

437 **Figure 4A yki:** *yw/; esg-Gal4, UAS-GFP/+; tubulin-Gal80<sup>ts</sup>/ UAS-yki*

438 **Figure 4A DIAP1:** *yw/; esg-Gal4, UAS-GFP/ +; tubulin-Gal80<sup>ts</sup>/ UAS-DIAP1*

439 **Figure 4A svb-RNAi:** *yw/; esg-Gal4, UAS-GFP/ +; tubulin-Gal80<sup>ts</sup>/ UAS-svb-RNAi*

440 **Figure 4A hpo+ ovoBt:** *yw/; esg-Gal4, UAS-GFP/ UAS-hpo; tubulin-Gal80<sup>ts</sup>/ UAS-ovoB*

441 **Figure 4A yki+ svb-RNAi:** *yw/; esg-Gal4, UAS-GFP/ +; tubulin-Gal80<sup>ts</sup>/ UAS-ovoB, UAS-yki*

442 **Figure 4A DIAP1+ svb-RNAi:** *yw/; esg-Gal4, UAS-GFP/ +; tubulin-Gal80<sup>ts</sup>/ UAS-DIAP1,  
443 UAS-svb-RNAi*

444 **Figure 4D control:** *yw/; esg-Gal4, UAS-GFP/ +; tubulin-Gal80<sup>ts</sup>/ DIAP1-LacZ/+*

445 **Figure 4D yki:** *yw/; esg-Gal4, UAS-GFP/ +; tubulin-Gal80<sup>ts</sup>/ DIAP1-LacZ/ UAS-yki*

446 **Figure 4D ovoA:** *yw/; esg-Gal4, UAS-GFP/ +; tubulin-Gal80<sup>ts</sup>/ DIAP1-LacZ/ UAS-ovoA*

- 447 **Figure 4D** *yki + ovoA*: *yw/w; esg-Gal4, UAS-GFP/+; tubulin-Gal80<sup>ts</sup>/DIAP1-LacZ/ UAS-yki,*  
448 *UAS-ovoA*
- 449 **Figure 4E control**: *yw/w; esg-Gal4, UAS-GFP/+; tubulin-Gal80<sup>ts</sup>/DIAP14.3-GFP/+*  
450 **Figure 4E yki**: *yw/w; esg-Gal4, UAS-GFP/+; tubulin-Gal80<sup>ts</sup>/DIAP14.3-GFP/ UAS-yki*  
451 **Figure 4E ovoA**: *yw/w; esg-Gal4, UAS-GFP/+; tubulin-Gal80<sup>ts</sup>/DIAP14.3-GFP/ UAS-ovoA*  
452 **Figure 4E yki + ovoA**: *yw/w; esg-Gal4, UAS-GFP/+; tubulin-Gal80<sup>ts</sup>/DIAP14.3-GFP/ UAS-*  
453 *yki, UAS-ovoA*
- 454 **Figure Sup1B**: *yw/w; esg-LacZ/svb<sup>E10</sup>-GFP*  
455 **Figure Sup1C**: *yw/w; esg-LacZ/+*  
456 **Figure Sup1C**: *w; svb<sup>E3N</sup>-LacZ/+*  
457 **Figure Sup1C**: *w; svb<sup>E6</sup>-LacZ/+*  
458 **Figure Sup1D**: *yw/w; esg-Gal4, UAS-GFP/+*  
459 **Figure Sup1E control**: *yw/w; dome-meso-Gal4, UAS-mCherry/+*  
460 **Figure Sup1E svb-RNAi**: *yw/w; dome-meso-Gal4, UAS-mCherry/+; UAS-svb-RNAi/+*
- 461 **Figure Sup2B**: *yw/w; esg-LacZ/+*  
462 **Figure Sup2B**: *w; priA-LacZ/+*  
463 **Figure Sup2B**: *yw/+; priJ-LacZ/+*
- 464 **Figure Sup3A**: *yw/w; esg-Gal4, UAS-GFP/+*  
465 **Figure Sup3B control**: *yw/w; esg-Gal4, UAS-mCD8::*GFP*/+; UAS-H2B::*RFP*, tubulin-*  
466 *Gal80<sup>ts</sup>/+*  
467 **Figure Sup3B miR-8**: *yw/UAS-mir8; esg-Gal4, UAS-mCD8::*GFP*/+; UAS-H2B::*RFP*,*  
468 *tubulin-Gal80<sup>ts</sup>/+*  
469 **Figure Sup3C control**: *yw/w; esg-Gal4, UAS-GFP/+; tubulin-Gal80<sup>ts</sup>/+*  
470 **Figure Sup3C ovoB**: *yw/w; esg-Gal4, UAS-GFP/+; tubulin-Gal80<sup>ts</sup>/UAS-ovoB*  
471 **Figure Sup3C yki-RNAi**: *yw/w; esg-Gal4, UAS-GFP/+; tubulin-Gal80<sup>ts</sup>/ UAS-yki*  
472 **Figure Sup3C yki-RNAi + ovoB**: *yw/w; esg-Gal4, UAS-GFP/+; tubulin-Gal80<sup>ts</sup>/ UAS-yki, UAS-*  
473 *ovoB*  
474 **Figure Sup3D ctrl**: *yw/w; col-Gal4, UAS-mCD8::*GFP*/+*  
475 **Figure Sup3D yki-RNAi**: *yw/w; col-Gal4, UAS-mCD8::*GFP*/+; UAS-yki/+*  
476 **Figure Sup3D ovoA**: *yw/w; col-Gal4, UAS-mCD8::*GFP*/+; UAS-ovoA/+*  
477 **Figure Sup3D yki-RNAi + ovoA**: *yw/w; col-Gal4, UAS-mCD8::*GFP*/+; UAS-yki, UAS-*  
478 *ovoA/+*  
479 **Figure Sup3E ctrl**: *yw/w; GMR-Gal4/+*  
480 **Figure Sup3E pri**: *yw/w; GMR-Gal4/UAS-pri*  
481 **Figure Sup3E yki**: *yw/w; GMR-Gal4/+; UAS-yki*  
482 **Figure Sup3E pri+ yki**: *yw/w; GMR-Gal4/UAS-pri; UAS-yki/+*

## 483 References

- 484 1. Kumar, A. *et al.* Molecular phylogeny of OVOL genes illustrates a conserved C2H2 zinc finger domain  
485 coupled by hypervariable unstructured regions. *PLoS One* **7**, e39399 (2012).
- 486 2. Mevel-Ninio, M., Terracol, R., Salles, C., Vincent, A. & Payre, F. ovo, a Drosophila gene required for  
487 ovarian development, is specifically expressed in the germline and shares most of its coding sequences with  
488 shavenbaby, a gene involved in embryo patterning. *Mech Dev* **49**, 83-95 (1995).
- 489 3. Payre, F., Vincent, A. & Carreno, S. ovo/svb integrates Wingless and DER pathways to control epidermis  
490 differentiation. *Nature* **400**, 271-275 (1999).
- 491 4. Dai, X. *et al.* The ovo gene required for cuticle formation and oogenesis in flies is involved in hair formation  
492 and spermatogenesis in mice. *Genes Dev* **12**, 3452-3463 (1998).
- 493 5. Li, B. *et al.* Ovol1 regulates meiotic pachytene progression during spermatogenesis by repressing Id2  
494 expression. *Development* **132**, 1463-1473 (2005).
- 495 6. Wells, J. *et al.* Ovol2 suppresses cell cycling and terminal differentiation of keratinocytes by directly  
496 repressing c-Myc and Notch1. *J Biol Chem* **284**, 29125-29135 (2009).
- 497 7. Crocker, J. *et al.* Low affinity binding site clusters confer hox specificity and regulatory robustness. *Cell*  
498 **160**, 191-203 (2015).
- 499 8. Frankel, N. *et al.* Phenotypic robustness conferred by apparently redundant transcriptional enhancers.  
500 *Nature* **466**, 490-493 (2010).
- 501 9. Frankel, N. *et al.* Morphological evolution caused by many subtle-effect substitutions in regulatory DNA.  
502 *Nature* **474**, 598-603 (2011).
- 503 10. McGregor, A.P. *et al.* Morphological evolution through multiple cis-regulatory mutations at a single gene.  
504 *Nature* **448**, 587-590 (2007).
- 505 11. Sucena, E., Delon, I., Jones, I., Payre, F. & Stern, D.L. Regulatory evolution of shavenbaby/ovo underlies  
506 multiple cases of morphological parallelism. *Nature* **424**, 935-938 (2003).
- 507 12. Chanut-Delalande, H., Fernandes, I., Roch, F., Payre, F. & Plaza, S. Shavenbaby couples patterning to  
508 epidermal cell shape control. *PLoS Biol* **4**, e290 (2006).
- 509 13. Fernandes, I. *et al.* Zona pellucida domain proteins remodel the apical compartment for localized cell shape  
510 changes. *Dev Cell* **18**, 64-76 (2010).
- 511 14. Menoret, D. *et al.* Genome-wide analyses of Shavenbaby target genes reveals distinct features of enhancer  
512 organization. *Genome Biol* **14**, R86 (2013).
- 513 15. Chanut-Delalande, H., Ferrer, P., Payre, F. & Plaza, S. Effectors of tridimensional cell morphogenesis and  
514 their evolution. *Semin Cell Dev Biol* **23**, 341-349 (2012).
- 515 16. Zanet, J., Chanut-Delalande, H., Plaza, S. & Payre, F. Small Peptides as Newcomers in the Control of  
516 Drosophila Development. *Curr Top Dev Biol* **117**, 199-219 (2016).
- 517 17. Kondo, T. *et al.* Small peptides switch the transcriptional activity of Shavenbaby during Drosophila  
518 embryogenesis. *Science* **329**, 336-339 (2010).
- 519 18. Chanut-Delalande, H. *et al.* Pri peptides are mediators of ecdysone for the temporal control of development.  
520 *Nat Cell Biol* **16**, 1035-1044 (2014).
- 521 19. Watanabe, K. *et al.* Mammary morphogenesis and regeneration require the inhibition of EMT at terminal  
522 end buds by Ovol2 transcriptional repressor. *Dev Cell* **29**, 59-74 (2014).



- 523 20. Roca, H. *et al.* A bioinformatics approach reveals novel interactions of the OVOL transcription factors in the regulation of epithelial - mesenchymal cell reprogramming and cancer progression. *BMC Syst Biol* **8**, 29 (2014).  
524  
525
- 526 21. Hong, T. *et al.* An Ovol2-Zeb1 Mutual Inhibitory Circuit Governs Bidirectional and Multi-step Transition between Epithelial and Mesenchymal States. *PLoS Comput Biol* **11**, e1004569 (2015).  
527
- 528 22. Roca, H. *et al.* Transcription factors OVOL1 and OVOL2 induce the mesenchymal to epithelial transition in human cancer. *PLoS One* **8**, e76773 (2013).  
529
- 530 23. Wang, Z.H. *et al.* Ovol2 gene inhibits the Epithelial-to-Mesenchymal Transition in lung adenocarcinoma by transcriptionally repressing Twist1. *Gene* **600**, 1-8 (2017).  
531
- 532 24. Ricketts, C.J. *et al.* Genome-wide CpG island methylation analysis implicates novel genes in the pathogenesis of renal cell carcinoma. *Epigenetics* **7**, 278-290 (2012).  
533
- 534 25. Jia, D. *et al.* OVOL guides the epithelial-hybrid-mesenchymal transition. *Oncotarget* **6**, 15436-15448 (2015).  
535
- 536 26. Li, S. & Yang, J. Ovol proteins: guardians against EMT during epithelial differentiation. *Dev Cell* **29**, 1-2 (2014).  
537
- 538 27. Nieto, M.A., Huang, R.Y., Jackson, R.A. & Thiery, J.P. Emt: 2016. *Cell* **166**, 21-45 (2016).
- 539 28. Jolly, M.K. *et al.* Coupling the modules of EMT and stemness: A tunable 'stemness window' model. *Oncotarget* **6**, 25161-25174 (2015).  
540
- 541 29. Wu, R.S. *et al.* OVOL2 antagonizes TGF-beta signaling to regulate epithelial to mesenchymal transition during mammary tumor metastasis. *Oncotarget* **8**, 39401-39416 (2017).  
542
- 543 30. Lapan, S.W. & Reddien, P.W. Transcriptome analysis of the planarian eye identifies ovo as a specific regulator of eye regeneration. *Cell Rep* **2**, 294-307 (2012).  
544
- 545 31. Lee, B. *et al.* Transcriptional mechanisms link epithelial plasticity to adhesion and differentiation of epidermal progenitor cells. *Dev Cell* **29**, 47-58 (2014).  
546
- 547 32. Kitazawa, K. *et al.* OVOL2 Maintains the Transcriptional Program of Human Corneal Epithelium by Suppressing Epithelial-to-Mesenchymal Transition. *Cell Rep* **15**, 1359-1368 (2016).  
548
- 549 33. Kim, J.Y. *et al.* OVOL2 is a critical regulator of ER71/ETV2 in generating FLK1+, hematopoietic, and endothelial cells from embryonic stem cells. *Blood* **124**, 2948-2952 (2014).  
550
- 551 34. Beyenbach, K.W., Skaer, H. & Dow, J.A. The developmental, molecular, and transport biology of Malpighian tubules. *Annu Rev Entomol* **55**, 351-374 (2010).  
552
- 553 35. Denholm, B. Shaping up for action: the path to physiological maturation in the renal tubules of Drosophila. *Organogenesis* **9**, 40-54 (2013).  
554
- 555 36. Sözen, M.A., Armstrong, J.D., Yang, M., Kaiser, K. & Dow, J.A. Functional domains are specified to single-cell resolution in a Drosophila epithelium. *Proc. Natl. Acad. Sci. U.S.A.* **94**, 5207-5212 (1997).  
556
- 557 37. Singh, S.R., Liu, W. & Hou, S.X. The adult Drosophila malpighian tubules are maintained by multipotent stem cells. *Cell Stem Cell* **1**, 191-203 (2007).  
558
- 559 38. Takashima, S., Paul, M., Aghajanian, P., Younossi-Hartenstein, A. & Hartenstein, V. Migration of Drosophila intestinal stem cells across organ boundaries. *Development* **140**, 1903-1911 (2013).  
560
- 561 39. Micchelli, C.A. & Perrimon, N. Evidence that stem cells reside in the adult Drosophila midgut epithelium. *Nature* **439**, 475-479 (2006).  
562

- 563 40. Loza-Coll, M.A., Southall, T.D., Sandall, S.L., Brand, A.H. & Jones, D.L. Regulation of *Drosophila*  
564 intestinal stem cell maintenance and differentiation by the transcription factor Escargot. *EMBO J* **33**, 2983-  
565 2996 (2014).
- 566 41. Korzelius, J. *et al.* Escargot maintains stemness and suppresses differentiation in *Drosophila* intestinal stem  
567 cells. *EMBO J* **33**, 2967-2982 (2014).
- 568 42. Stern, D.L. & Frankel, N. The structure and evolution of cis-regulatory regions: the shavenbaby story.  
569 *Philos. Trans. R. Soc. Lond., B, Biol. Sci.* **368**, 20130028 (2013).
- 570 43. Jiang, H. *et al.* Cytokine/Jak/Stat Signaling Mediates Regeneration and Homeostasis in the *Drosophila*  
571 Midgut. *Cell* **137**, 1343-1355 (2009).
- 572 44. Delon, I., Chanut-Delalande, H. & Payre, F. The Ovo/Shavenbaby transcription factor specifies actin  
573 remodelling during epidermal differentiation in *Drosophila*. *Mech Dev* **120**, 747-758 (2003).
- 574 45. Zanet, J. *et al.* Pri sORF peptides induce selective proteasome-mediated protein processing. *Science* **349**,  
575 1356-1358 (2015).
- 576 46. Galindo, M.I., Pueyo, J.I., Fouix, S., Bishop, S.A. & Couso, J.P. Peptides encoded by short ORFs control  
577 development and define a new eukaryotic gene family. *PLoS Biol* **5**, e106 (2007).
- 578 47. Andrews, J. *et al.* OVO transcription factors function antagonistically in the *Drosophila* female germline.  
579 *Development* **127**, 881-892 (2000).
- 580 48. Antonello, Z.A., Reiff, T., Esther, B.-I. & Dominguez, M. Robust intestinal homeostasis relies on cellular  
581 plasticity in enteroblasts mediated by *miR-8-Escargot* switch. *EMBO J.* **34**, 2025-2041 (2015).
- 582 49. Yang, M.Y., Wang, Z., MacPherson, M., Dow, J.A. & Kaiser, K. A novel *Drosophila* alkaline phosphatase  
583 specific to the ellipsoid body of the adult brain and the lower Malpighian (renal) tubule. *Genetics* **154**, 285-  
584 297 (2000).
- 585 50. Ma, M. *et al.* Wildtype adult stem cells, unlike tumor cells, are resistant to cellular damages in *Drosophila*.  
586 *Dev Biol* **411**, 207-216 (2016).
- 587 51. Hay, B.A., Wolff, T. & Rubin, G.M. Expression of baculovirus P35 prevents cell death in *Drosophila*.  
588 *Development* **120**, 2121-2129 (1994).
- 589 52. Payre, F. Genetic control of epidermis differentiation in *Drosophila*. *Int J Dev Biol* **48**, 207-215 (2004).
- 590 53. Pan, D. The hippo signaling pathway in development and cancer. *Dev. Cell* **19**, 491-505 (2010).
- 591 54. Staley, B.K. & Irvine, K.D. Hippo signaling in *Drosophila*: recent advances and insights. *Dev. Dyn.* **241**,  
592 3-15 (2012).
- 593 55. Sansores-Garcia, L. *et al.* Modulating F-actin organization induces organ growth by affecting the Hippo  
594 pathway. *EMBO J* **30**, 2325-2335 (2011).
- 595 56. Gaspar, P., Holder, M.V., Aerne, B.L., Janody, F. & Tapon, N. Zyxin antagonizes the FERM protein  
596 expanded to couple f-actin and yorkie-dependent organ growth. *Current Biology* **25**, 679-689 (2015).
- 597 57. Shaw, R.L. *et al.* The Hippo pathway regulates intestinal stem cell proliferation during *Drosophila* adult  
598 midgut regeneration. *Development* **137**, 4147-4158 (2010).
- 599 58. Staley, B.K. & Irvine, K.D. Warts and yorkie mediate intestinal regeneration by influencing stem cell  
600 proliferation. *Current Biology* **20**, 1580-1587 (2010).
- 601 59. Oh, H. & Irvine, K.D. Cooperative regulation of growth by Yorkie and Mad through bantam. *Dev Cell* **20**,  
602 109-122 (2011).

- 603 60. Huang, J., Wu, S., Barrera, J., Matthews, K. & Pan, D. The Hippo signaling pathway coordinately regulates  
604 cell proliferation and apoptosis by inactivating Yorkie, the Drosophila homolog of YAP. *Cell* **122**, 421-434  
605 (2005).
- 606 61. Zhang, X., Milton, C.C., Poon, C.L., Hong, W. & Harvey, K.F. Wbp2 cooperates with Yorkie to drive  
607 tissue growth downstream of the *Salvador-Warts-Hippo* pathway. *Cell Death Differ.* **18**, 1346-1355 (2011).
- 608 62. Oh, H. *et al.* Genome-wide association of Yorkie with chromatin and chromatin-remodeling complexes.  
609 *Cell Rep* **3**, 309-318 (2013).
- 610 63. Zhang, C. *et al.* The ecdysone receptor coactivator Taiman links Yorkie to transcriptional control of  
611 germline stem cell factors in somatic tissue. *Dev Cell* **34**, 168-180 (2015).
- 612 64. Poernbacher, I., Baumgartner, R., Marada, S.K., Edwards, K. & Stocker, H. Drosophila Pez acts in Hippo  
613 signaling to restrict intestinal stem cell proliferation. *Curr Biol* **22**, 389-396 (2012).
- 614 65. Tapon, N. *et al.* salvador Promotes both cell cycle exit and apoptosis in Drosophila and is mutated in human  
615 cancer cell lines. *Cell* **110**, 467-478 (2002).
- 616 66. Payre, F. & Desplan, C. RNA. Small peptides control heart activity. *Science* **351**, 226-227 (2016).
- 617 67. Pueyo, J.I., Magny, E.G. & Couso, J.P. New Peptides Under the s(ORF)ace of the Genome. *Trends Biochem*  
618 *Sci* **41**, 665-678 (2016).
- 619 68. Karpowicz, P., Perez, J. & Perrimon, N. The Hippo tumor suppressor pathway regulates intestinal stem cell  
620 regeneration. *Development* **137**, 4135-4145 (2010).
- 621 69. Huang, Q. *et al.* Ubr3 E3 ligase regulates apoptosis by controlling the activity of DIAP1 in Drosophila.  
622 *Cell Death Differ* **21**, 1961-1970 (2014).
- 623 70. Tang, Y., Feinberg, T., Keller, E.T., Li, X.Y. & Weiss, S.J. Snail/Slug binding interactions with YAP/TAZ  
624 control skeletal stem cell self-renewal and differentiation. *Nat Cell Biol* **18**, 917-929 (2016).
- 625



626 **Acknowledgments**

627 We are grateful to FlyBase, Bloomington and Vienna stock centers, Developmental Studies  
628 Hybridoma Bank, as well as N. Tapon, J. Colombani, K.F. Harvey, D.J. Pan, J. Dow and H.  
629 Skaer and M. Crozatier, for providing flies, antibodies and molecular reagents. We also thank  
630 B. Ronsin (Toulouse RIO Imaging) for help with microscopy, A. Alsawadi, A. Dib, J. Zanet,  
631 M. Soulard and P. Valenti for experimental support. We also thank all members of the Payre  
632 lab for critical reading of the manuscript. This work was supported by ANR (Chrononet),  
633 Fondation pour le Recherche Médicale (FRM), Programme Scientifique de Cooperation  
634 Internationale (PSCI) for D.O. and F.P., and by MEXT KAKENHI (JP26113006) for Y.K..  
635 J.B. was supported by fellowships from “Ministère de l’Enseignement et de la Recherche”  
636 and “La Ligue contre le Cancer.”

637 **Author Contributions**

638 C.P., S.P., Y.K., D.O. and F.P. conceived and directed the project, following initial  
639 observations made by D.O.. J.B. carried out most of the experiments presented here, under the  
640 supervision of C.P. and other experiments were conducted by C.P., K.A., Y.Y, S.I and D.O..  
641 A.M.F analyzed NGS data. J.B., C.P., K.A., Y.Y., S.I., H.C.D., S.P., Y.K., D.O. and F.P.  
642 analyzed data and contributed to their interpretation. J.B., C.P. and F.P. prepared the figures  
643 and wrote the manuscript. All authors helped to write the paper.

644 **Competing financial interests.**

645 The authors declare having not competing financial interests.

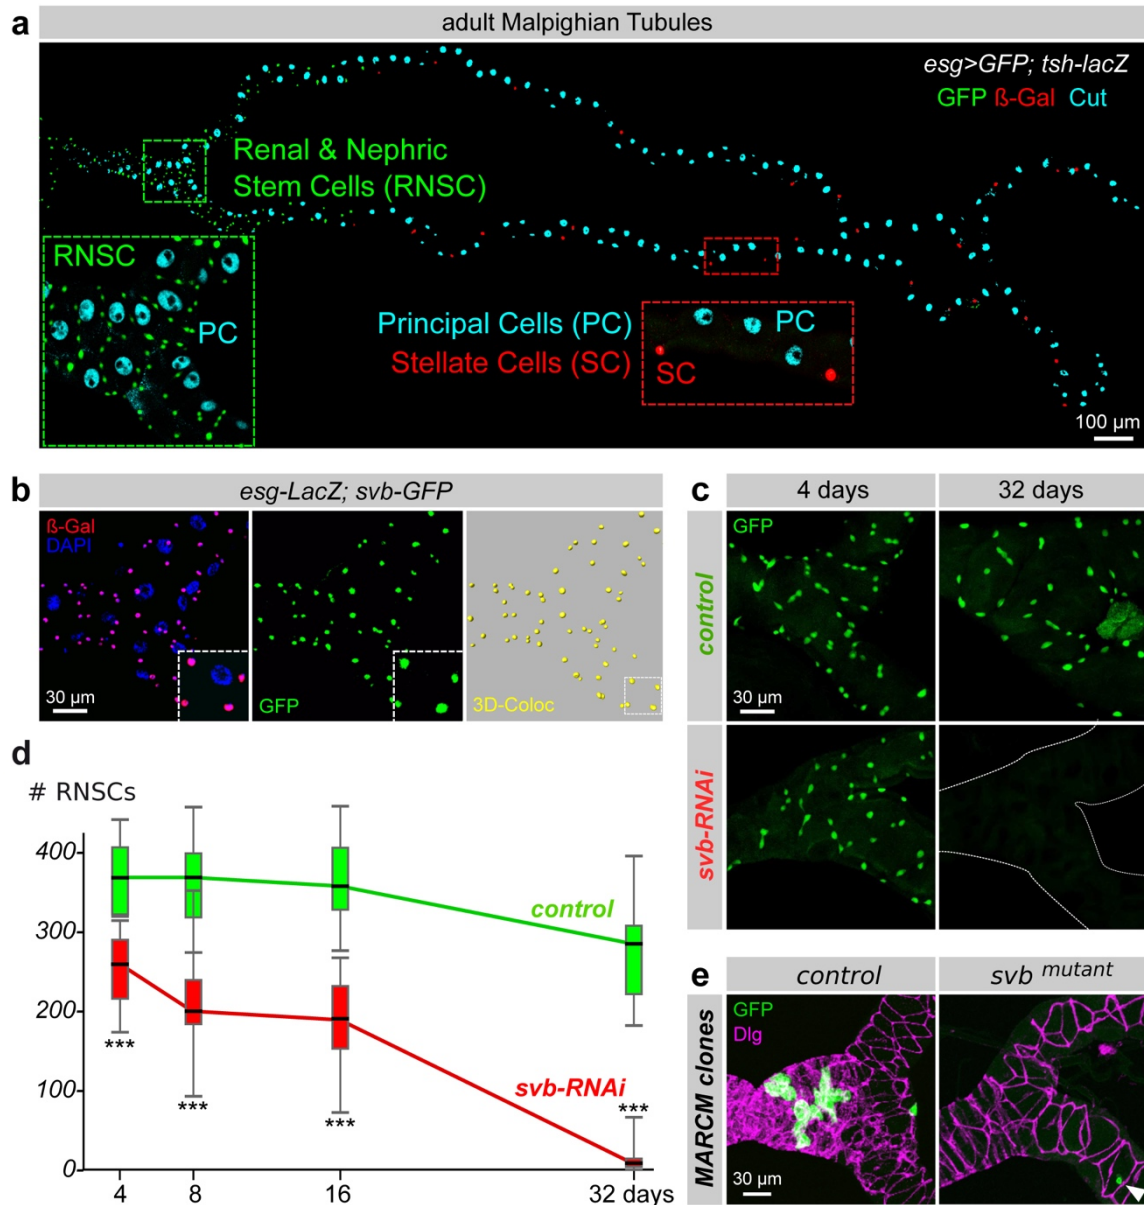

646

Bohère *et al.*, Figure 1

647 **Figure 1: *svb* is expressed in RNSCs and required for their maintenance.** (a) Adult Malpighian  
 648 tubules are composed of three types of cells. Principal cells (PC) are identified by immunostaining  
 649 against Cut (cyan) and stellate cells (SC) by *tsh-LacZ* (in red). RNSCs located in the lower tubules  
 650 express *esg-Gal4*, *UAS-GFP* (green). (b) Fork region of the Malpighian tubules. The expression of *svb*  
 651 and *esg* was monitored by the expression of *svb-E-GFP* (green) and *esg-LacZ* (red) enhancers,  
 652 respectively. Nuclei were stained with DAPI (blue). (c) *esg<sup>ts</sup>*-driven *svb-RNAi* leads to a progressive  
 653 decrease in the number of RNSCs compared to control conditions (*esg<sup>ts</sup>* driving only GFP). (d)  
 654 Quantification of the number of RNSCs (*esg-GFP* positive) after 4, 8, 16 and 32 of transgene induction  
 655 in control (green) and *svb-RNAi* (red) conditions. (e) Genetic mosaics (MARCM) showing control and  
 656 *svb<sup>R9</sup>* clones, positively labelled with GFP (green) in the fork region of Malpighian tubules, 25 days after  
 657 clone induction. The white arrowhead indicates the position of a *svb*-mutant cell.

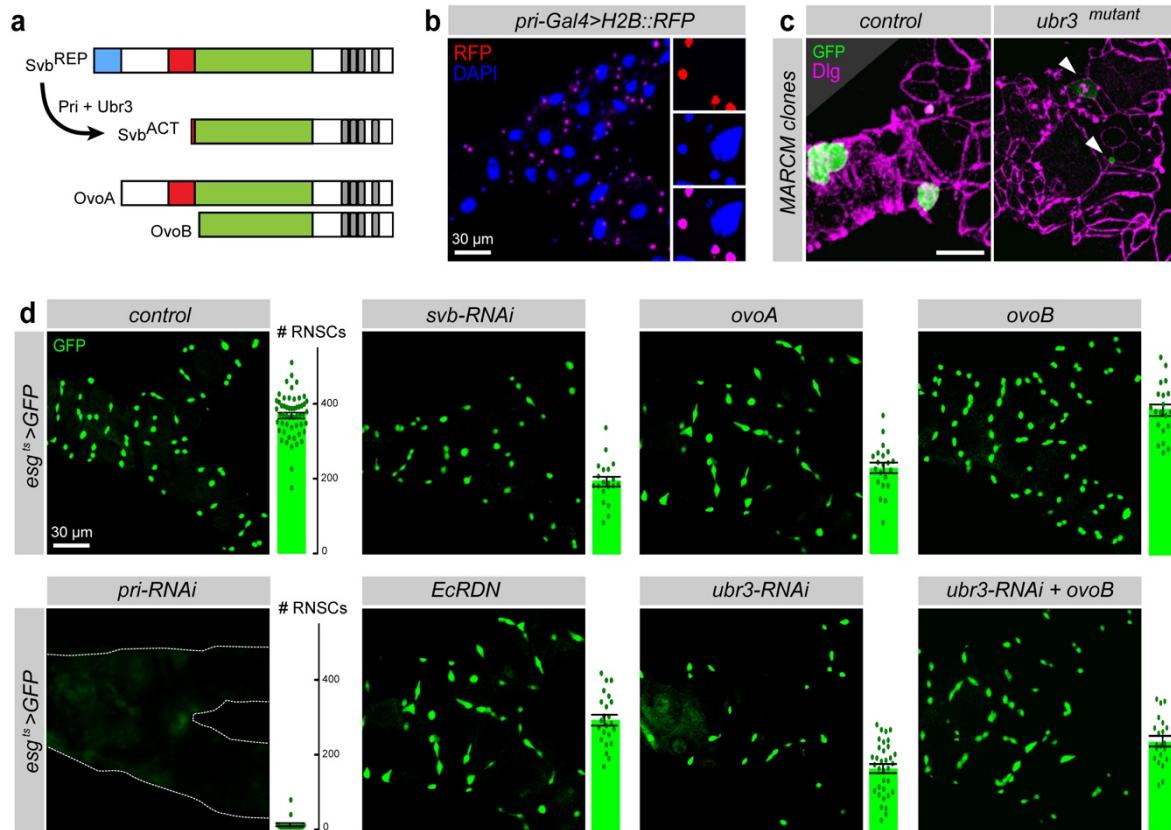

658

Bohère *et al.*, Figure 2

659 **Figure 2: Processing of Svb is essential for RNSC maintenance.** (a) Schematic representation of  
 660 Svb maturation, as well as the germinal isoforms OvoA and OvoB that act as constitutive (*pri*-  
 661 independent) repressor and activator, respectively. (b) Expression of *pri* monitored by the activity of *pri*-  
 662 *Gal4* driving the expression of H2B::RFP (red). The nuclei (DAPI) are in blue. (c) MARCM clones of  
 663 control and *ubr3<sup>B</sup>* cells, 25 days after induction. Arrowheads indicate positions of *ubr3* mutant cells. (d)  
 664 Fork region of Malpighian tubules, with *esg<sup>ts</sup>*-driven expression of GFP and the indicated transgenes,  
 665 after 8 days of induction. Quantification of the number of *esg*<sup>+</sup> cells *per* tubule is indicated on the right  
 666 of each picture (see also Supplementary Figure 2).

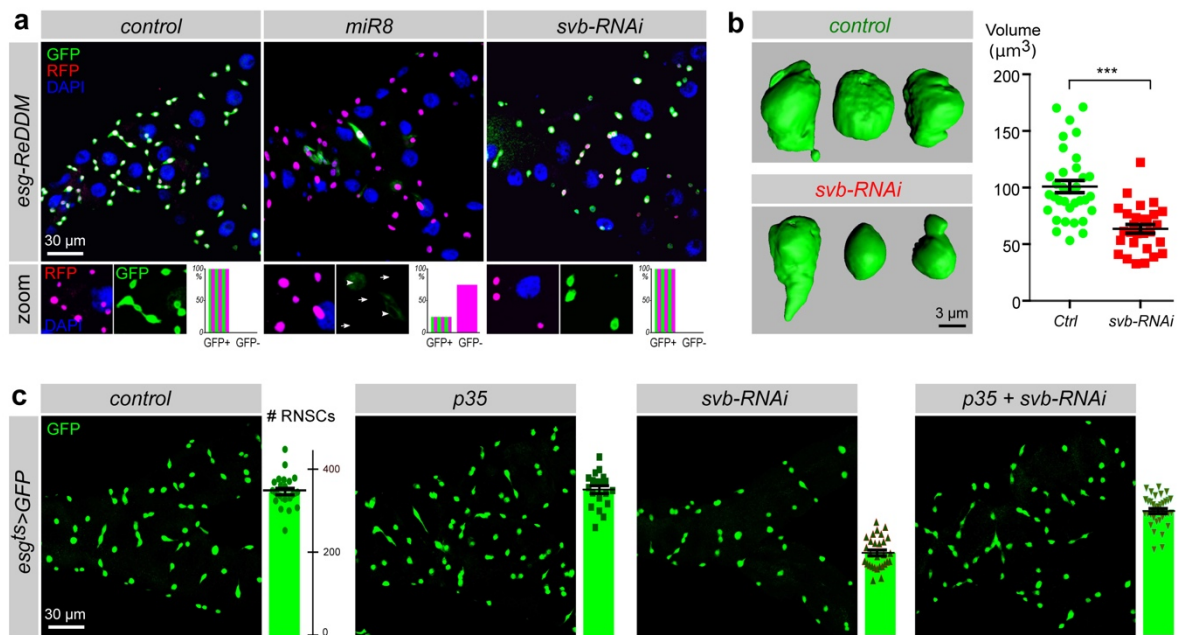

Bohère *et al.*, Figure 3

667

668 **Figure 3: *svb* protects RNSCs from apoptosis.** (a) Lineage-tracing experiments (*esg-ReDDM*) at 8  
669 days after induction. While RNSCs express both mCD8::GFP (green) and H2B::RFP (red), only the  
670 stable H2B::RFP protein persists in their progeny. Nuclei are in blue (DAPI). RFP positive cells that lack  
671 or display remnants of GFP levels are indicated by arrows and arrowheads, respectively. (b) Left,  
672 three-dimensional reconstruction of 3 different RNSCs in control (*esg<sup>ts</sup>>GFP*) and *svb-RNAi* contexts. Pictures  
673 show GFP after 8 days of treatment. Right, quantification of the RNSC volume in control (*Ctrl*, green)  
674 and *svb-RNAi* conditions. (c) Rescue of *svb*-depleted RNSCs by *p35*. *esg<sup>ts</sup>* was used to drive the  
675 expression of indicated transgenes (together with GFP), during 8 days. Quantification of *esg*+ cells is  
676 shown at the right of each picture.



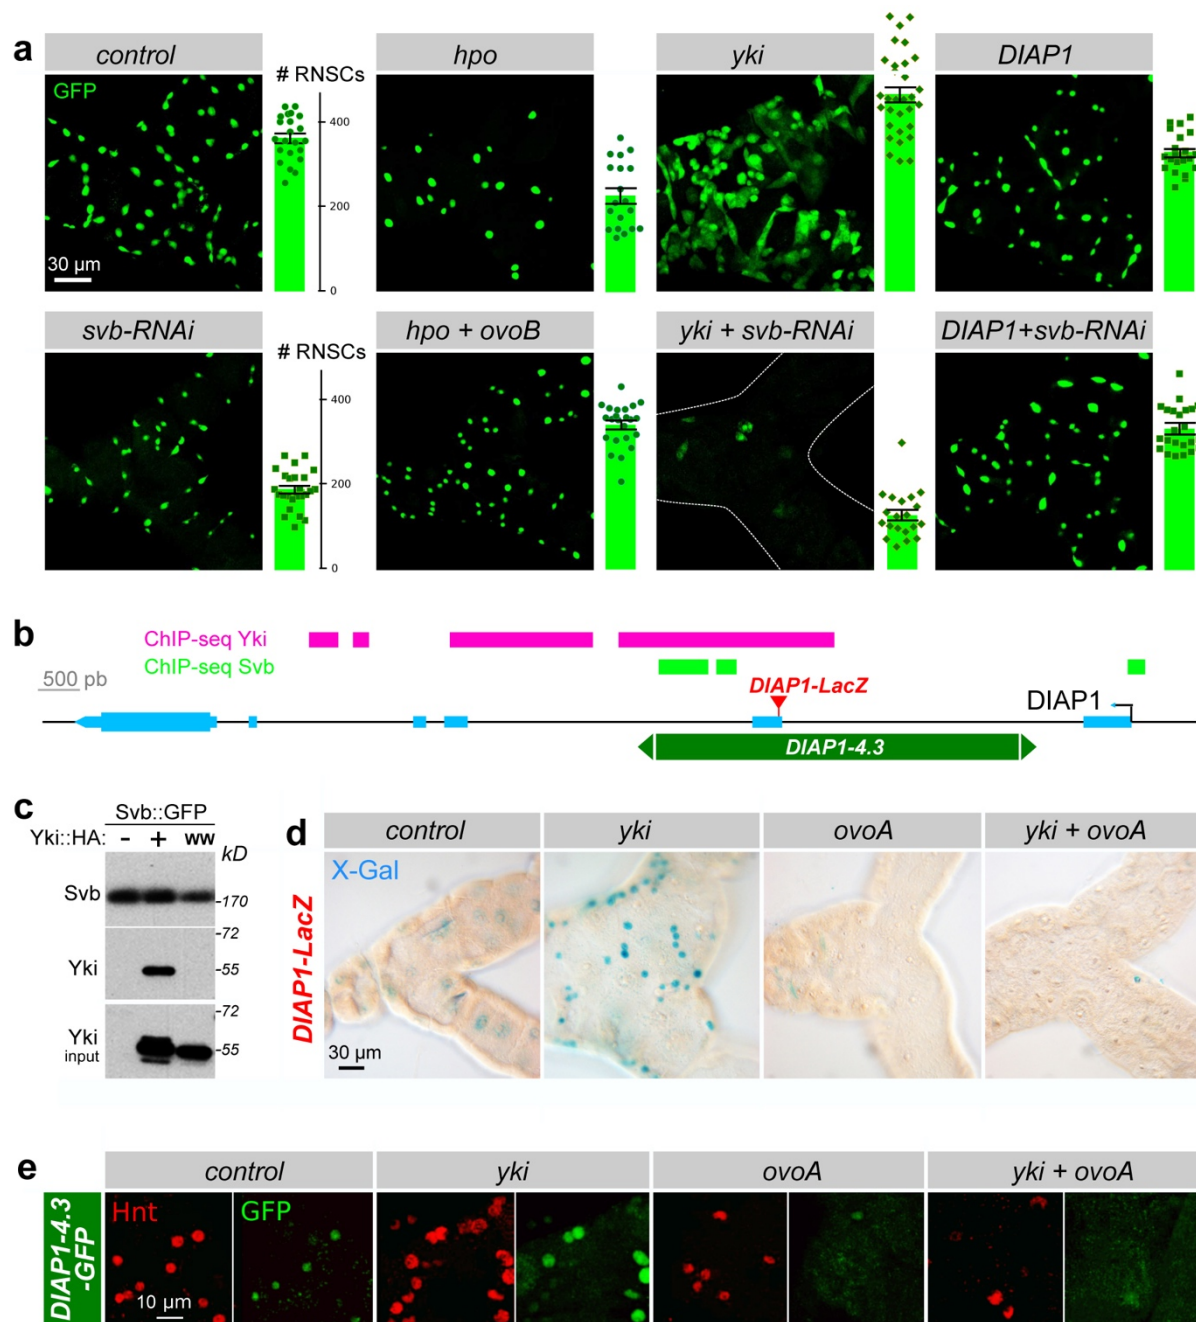

677

Bohère *et al.*, Figure 4

678 **Figure 4: *svb* is a member of the Hippo pathway.** (a) Pictures of Malpighian tubules with *esg<sup>ts</sup>*-driven  
679 expression of GFP (control) and indicated transgenes. Quantification of *esg<sup>+</sup>* cells is given on each  
680 picture (see also Supplementary Figure 3f). (b) Drawing of the *DIAP1* locus. Exons are represented in  
681 cyan, the *DIAP1-4.3* enhancer in dark green and the insertion site of the *DIAP1-LacZ* reporter (J5C8) is  
682 in red. Regions bound in ChIP-seq (MACS peaks) by Svb and Yki are indicated in green and magenta,  
683 respectively. (c) Svb co-immuno-precipitates with Yki in S2 cells. Svb::GFP and Yki::HA, or a mutated  
684 form of Yki substituting the WW domains (Yki<sup>WW</sup>::HA), were expressed in S2 cells. Protein immuno-  
685 precipitated by anti-GFP were blotted with anti-GFP and anti-HA antibodies. (d) *esg<sup>ts</sup>* was used to drive  
686 the expression of *yki*, *svb<sup>REP</sup>* (*ovoA*), and *yki* together with *svb<sup>REP</sup>* in RNSCs. The expression of *DIAP1*  
687 was followed by the activity of *DIAP1-lacZ*. (e) Expression of the *DIAP1-4.3-GFP* enhancer was followed  
688 by immuno-staining against GFP (green) and Hindsight (Hnt, red) revealing the antagonistic influence  
689 of Yki and OvoA on RNSCs.
